# Supplementary material
Source: publisher figshare collection journal article supplement (https://acs.figshare.com/ndownloader/files/4396546)
Supplement: Supplementary file 1 [file 4396546]

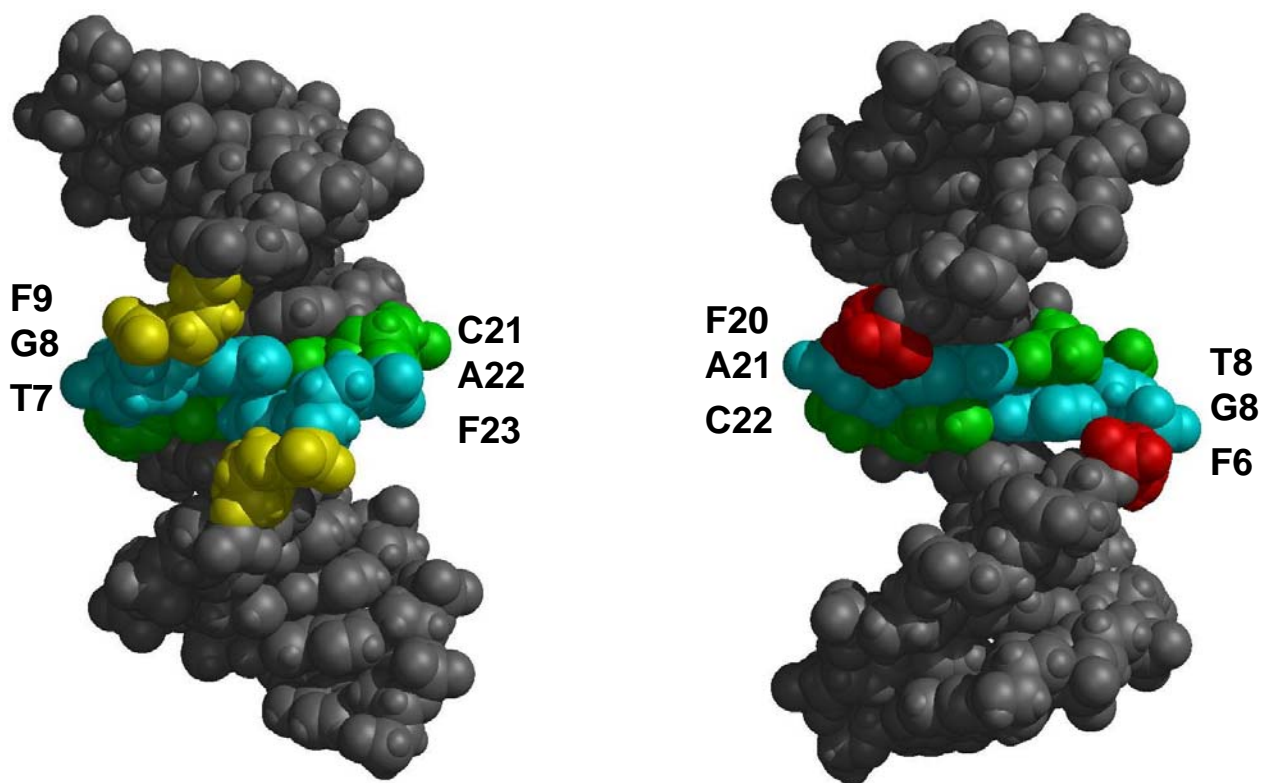

**Figure S5:** Space-filling representation of the  $(AP)_2-3$  duplex (left) showing the AP residues in yellow on either side of the minor groove and the  $(AP)_2+3$  duplex (right) with AP residues in red and on either side of the major groove
